# Supplementary material for: Association of incident obstructive sleep apnoea with outcomes in a large cohort of US veterans
Source: HighWire-hosted journal article supplement (doi:10.1136/thoraxjnl-2015-206970), 2015-06-02

## **SUPPLEMENT**

**Table S1:** ICD-9/CPT and surgical codes used to define obstructive sleep apnea (OSA), polysomnography (PSG) and continuous positive airway pressure (CPAP) treatment

| <b><u>Diagnosis/procedure s</u></b> | <b><u>ICD-9/CPT and surgical code</u></b>                             |
|-------------------------------------|-----------------------------------------------------------------------|
| OSA                                 | 3272x, 78057                                                          |
| PSG                                 | 8917 (surgical) and 95800 95801, 95805, 95806,<br>95807, 95808, 95810 |
| CPAP                                | 9390 (surgical) and 95811                                             |

---

Abbreviations: CPAP: continuous positive airway pressure treatment; OSA: obstructive sleep apnea; PSG: polysomnography

**Table S2:** ICD-9 codes used to define prevalent comorbid conditions and incident conditions

| <b>Comorbid condition</b>   | <b>ICD-9 code</b>                                                                |
|-----------------------------|----------------------------------------------------------------------------------|
| Hypertension                | 401-405                                                                          |
| Diabetes mellitus           | 250.x                                                                            |
| Myocardial infarction       | 410-410.9, 412                                                                   |
| Angina                      | 411, 413                                                                         |
| CAD                         | 414.0, 414.8, 414.9                                                              |
| PCI                         | 36.03, 36.04, 36.06, 36.07, 36.09                                                |
| CABG                        | 36.10-36.17, 36.19                                                               |
| CHF                         | 428-428.9                                                                        |
| Peripheral arterial disease | 440.0-440.9, 443, 443.x, 38.0, 38.1, 39.50,<br>39.22, 39.24, 39.25, 39.26, 39.28 |
| Cerebrovascular disease     | 430-438                                                                          |
| Chronic lung disease        | 490-496, 500-505, 506.4                                                          |
| Dementia                    | 290-290.9                                                                        |
| Rheumatologic disease       | 710.0, 710.1, 710.4, 714.0-714.2, 714.81, 725                                    |
| Peptic ulcer disease        | 531-534.9, 531.4-531.7, 532.4-532.7,<br>533.4-533.7, 534.4-534.7                 |
| Liver disease               | 571.x, 572.x, 456.0-456.21                                                       |
| Hemiplegia or paraplegia    | 344.1, 342-342.9                                                                 |
| Malignancy                  | 140-172.9, 174-195.8, 200-208.9, 196-199.1                                       |
| HIV/AIDS                    | 042, V08, 795.71                                                                 |
| Depression                  | 296.x                                                                            |

---

Abbreviations: CAD: coronary artery disease; PCI: percutaneous coronary intervention;  
CABG: coronary artery bypass grafting; CHF: congestive heart failure

**Table S3:** ICD9 codes used to define incident clinical events

| <b><u>Incident event</u></b> | <b><u>ICD9 code</u></b>           |
|------------------------------|-----------------------------------|
| Acute myocardial infarction  | 410.x                             |
| PCI                          | 36.03, 36.04, 36.06, 36.07, 36.09 |
| CABG                         | 36.10-36.17, 36.19                |
| Ischemic stroke              | 433.x, 434.x, 436.x               |

---

Abbreviations: PCI: percutaneous coronary intervention; CABG: coronary artery bypass grafting

**Table S4:** Procedure (CPT) codes used to define coronary interventions

| <b>Coronary intervention</b> | <b>CPT code</b>                                 |
|------------------------------|-------------------------------------------------|
| PCI                          | 92980 92981 92982 92984 92985 92986 92987 92988 |
|                              | 92989 92990 92991 92992 92993 92994 92995 92996 |
| CABG                         | 33510 33511 33512 33513 33514 33515 33516 33517 |
|                              | 33518 33519 33521 33522 33523 33533 33534 33535 |
|                              | 33536                                           |

---

Abbreviations: PCI: percutaneous coronary intervention; CABG: coronary artery bypass grafting

**Table S5:** The association of diagnosis of incident OSA and different outcomes in propensity-matched cohort of 42,340 patients (21,170-21,740 patients with and without diagnosis of incident OSA) estimated with Fine-Gray competing-risks analysis, where the death was considered as a competing event

|                                                |    | <b>CHD</b> |               | <b>Ischemic Stroke</b> |               | <b>CKD</b> |               |
|------------------------------------------------|----|------------|---------------|------------------------|---------------|------------|---------------|
|                                                |    | <b>SHR</b> | <b>95% CI</b> | <b>SHR</b>             | <b>95% CI</b> | <b>SHR</b> | <b>95% CI</b> |
| Diagnosis of incident OSA (ref.: OSA negative) | of | 3.28       | 3.02-3.56     | 3.19                   | 2.89-3.53     | 1.89       | 1.81-1.98     |

Abbreviations:

CHD: Coronary Heart Disease; CKD: Chronic Kidney Disease; OSA: Obstructive Sleep

Apnea; SHR, subhazard ratio; CI, confidence interval.

## **Legend of Figures**

**Figure S1:** Cumulative incidence curves of different outcomes (panel A: CHD free survival; panel B: ischemic stroke event free survival and panel C: CKD free survival) in patients with and without diagnosis of incident OSA estimated with Fine-Gray competing-risks analysis, where the death was considered as a competing event

**Figure S2:** Association between diagnosis of incident OSA and mortality using adjusted time-dependent Cox regression in different subgroups

Abbreviations: AA: African-American; BMI: Body mass index; CHD: coronary heart disease; CVD: Cardio-vascular disease; CPAP: Continuous Positive Airway Pressure; DM: Diabetes mellitus; eGFR: Estimated glomerular filtration rate; OSA: Obstructive Sleep Apnea

**Figure S3:** Association between diagnosis of incident OSA and incident CHD disease using adjusted Cox proportional regression in different subgroups

Abbreviations: AA: African-American; BMI: Body mass index; CHD: coronary heart disease; CVD: Cardio-vascular disease; CPAP: Continuous Positive Airway Pressure; DM: Diabetes mellitus; eGFR: Estimated glomerular filtration rate; OSA: Obstructive Sleep Apnea

**Figure S4:** Association between diagnosis of incident OSA and incident ischemic stroke disease using adjusted Cox proportional regression in different subgroups

Abbreviations: AA: African-American; BMI: Body mass index; CVD: Cardio-vascular disease; CPAP: Continuous Positive Airway Pressure; DM: Diabetes mellitus; eGFR: Estimated glomerular filtration rate; OSA: Obstructive Sleep Apnea

**Figure S5:** Association between diagnosis of incident OSA and incidence of eGFR <60 ml/min/1.73m<sup>2</sup> using adjusted time-dependent Cox regression in different subgroups

Abbreviations: AA: African-American; BMI: Body mass index; CKD: Chronic kidney disease; CVD: Cardio-vascular disease; CPAP: Continuous Positive Airway Pressure; DM: Diabetes mellitus; eGFR: Estimated glomerular filtration rate; OSA: Obstructive Sleep Apnea

**Figure S6:** Association between diagnosis of incident OSA and risk of rapid deterioration of kidney function using adjusted logistic regression in different subgroups

Abbreviations: AA: African-American; BMI: Body mass index; CVD: Cardio-vascular disease; CPAP: Continuous Positive Airway Pressure; DM: Diabetes mellitus; eGFR: Estimated glomerular filtration rate; OSA: Obstructive Sleep Apnea



**Figure S1:**

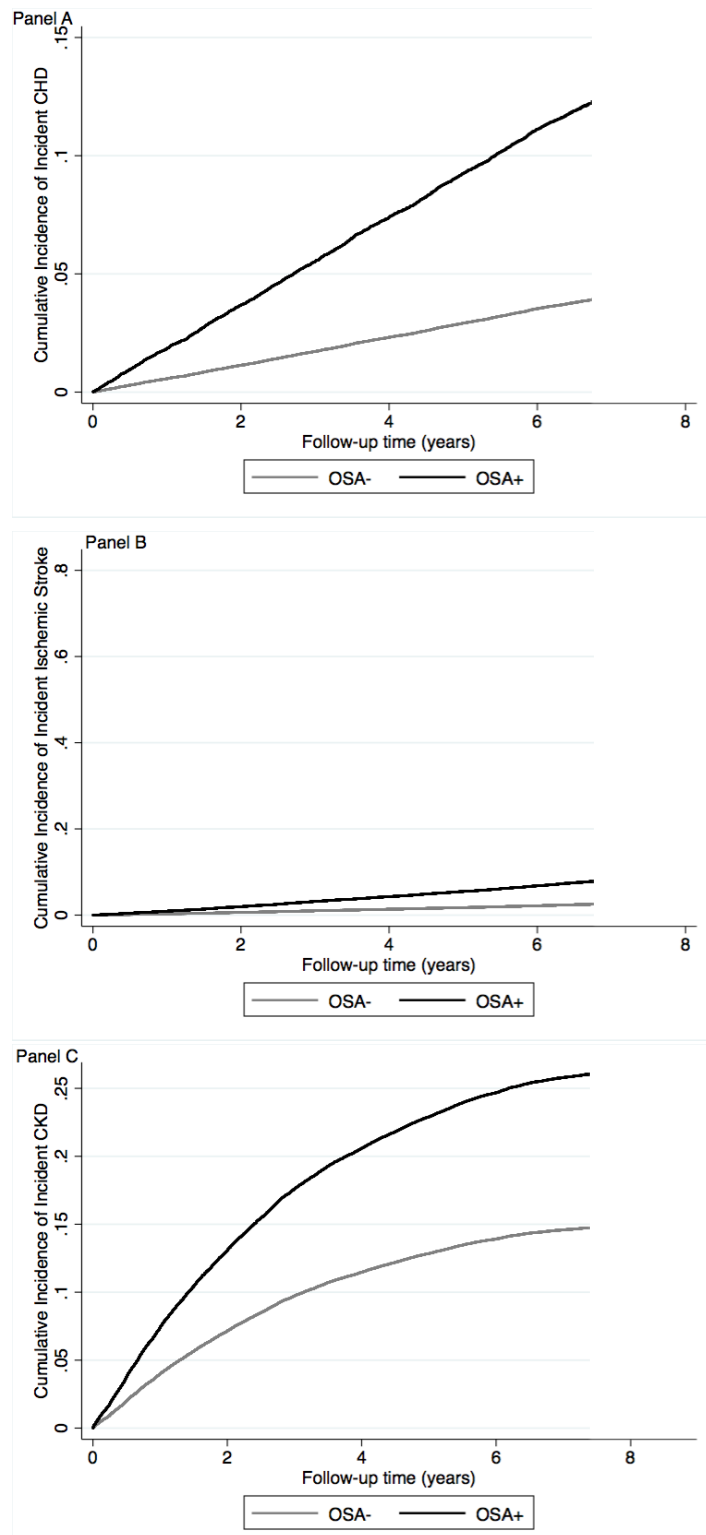

Figure S2:

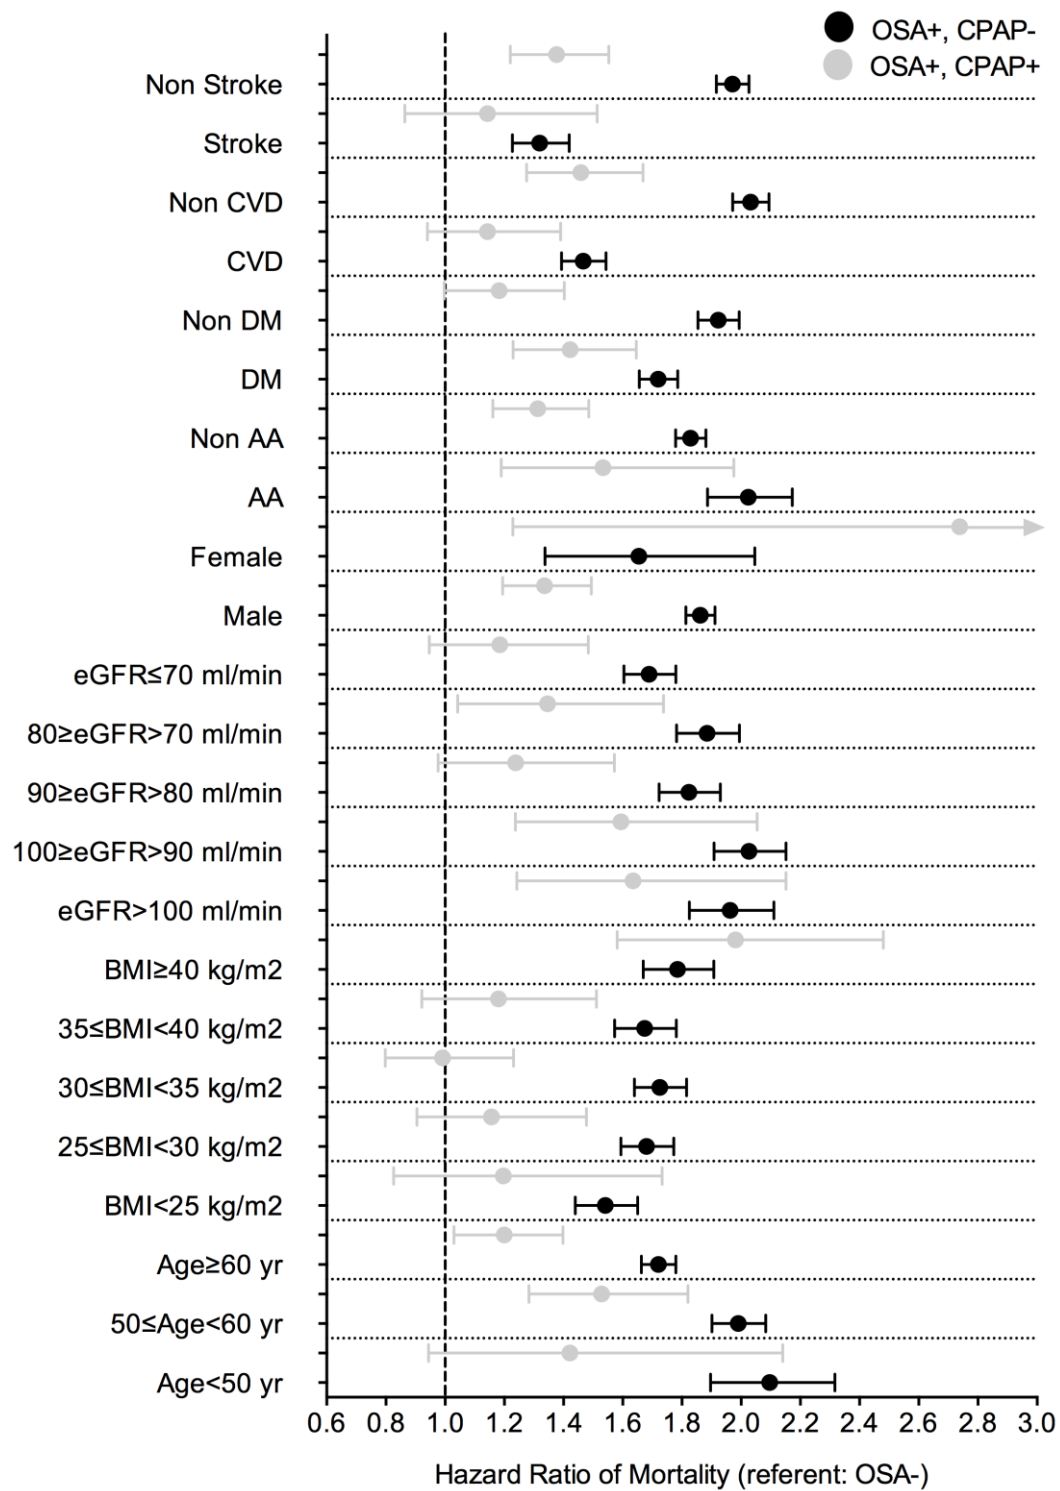

**Figure S3:**

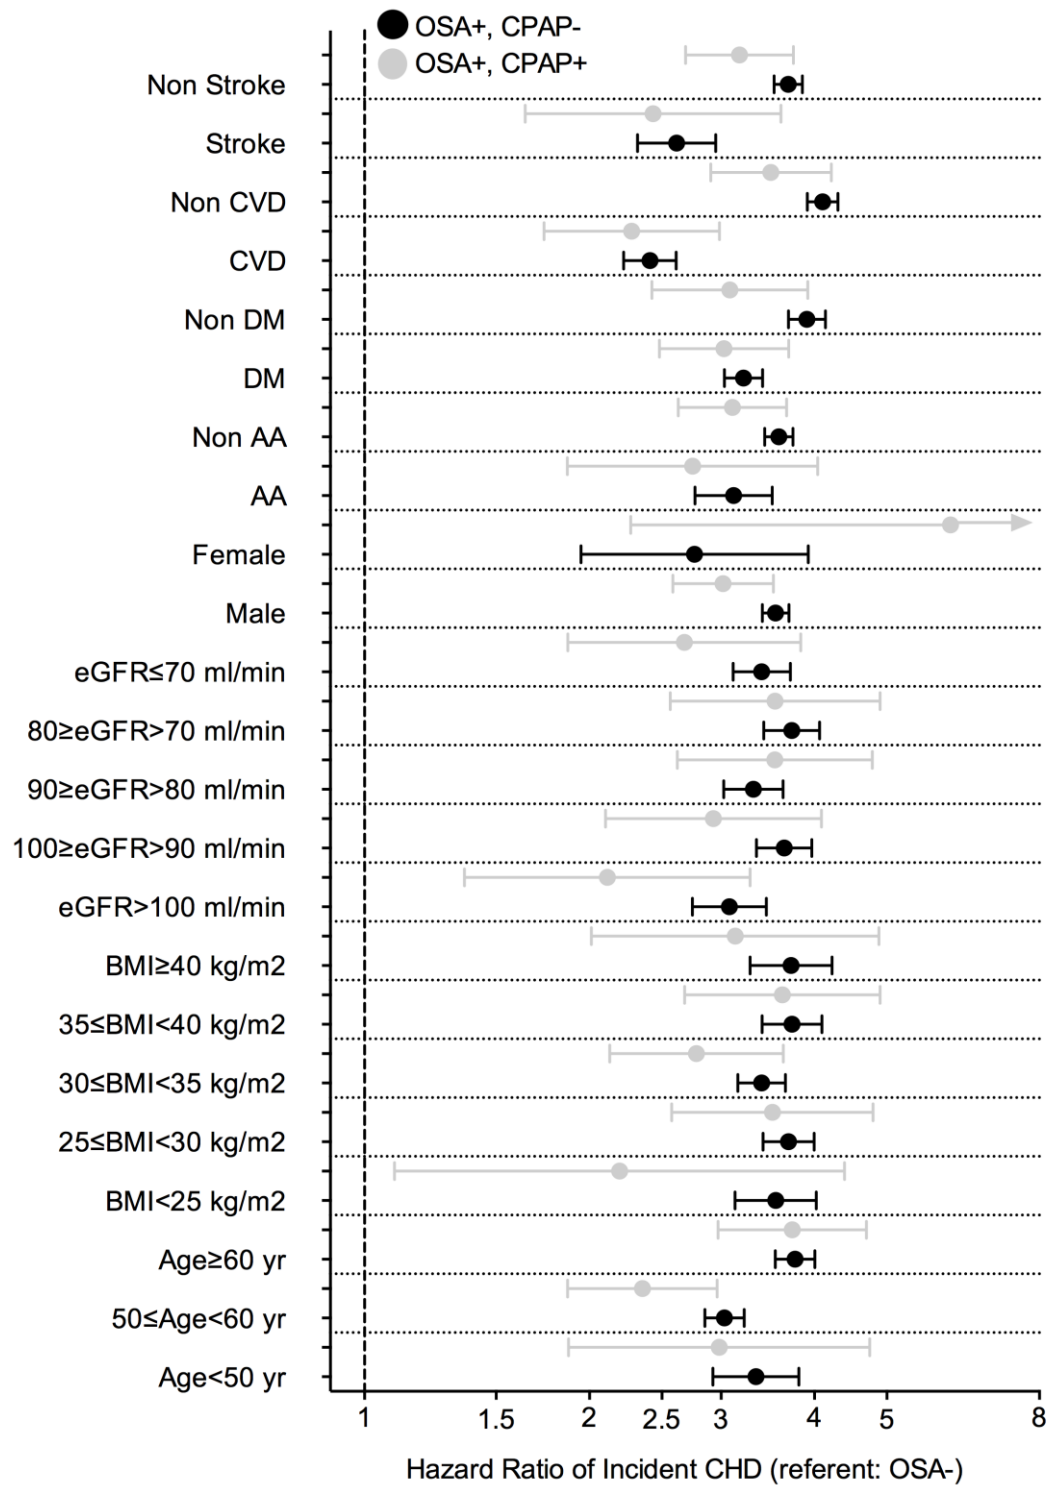

Figure S4:

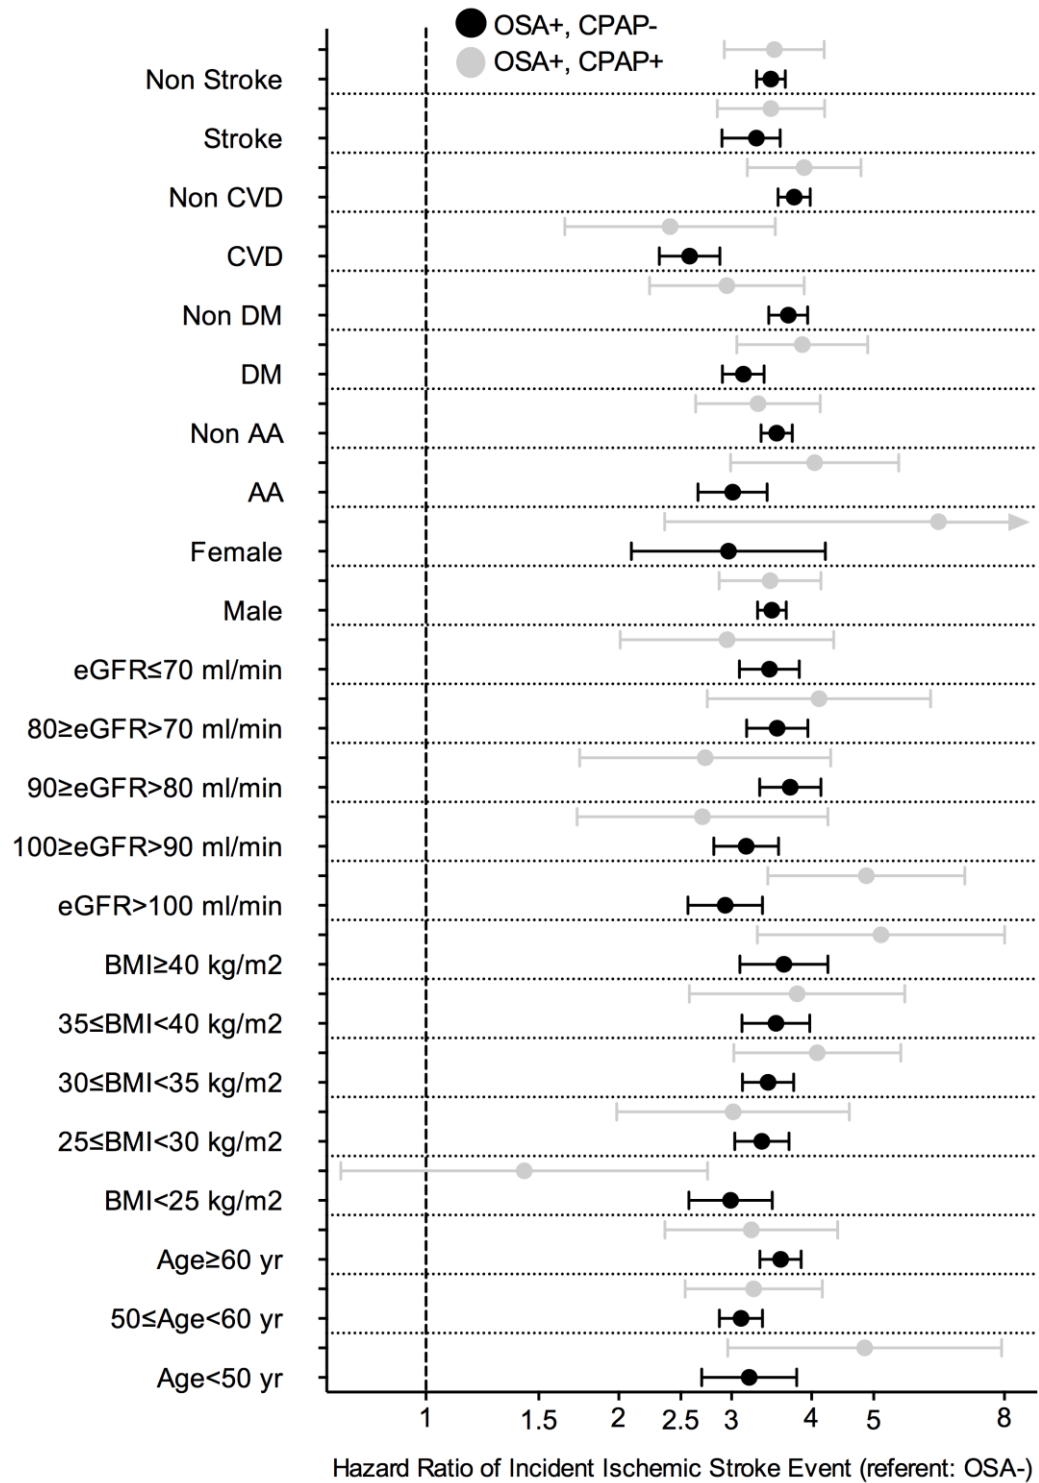

Figure S5:

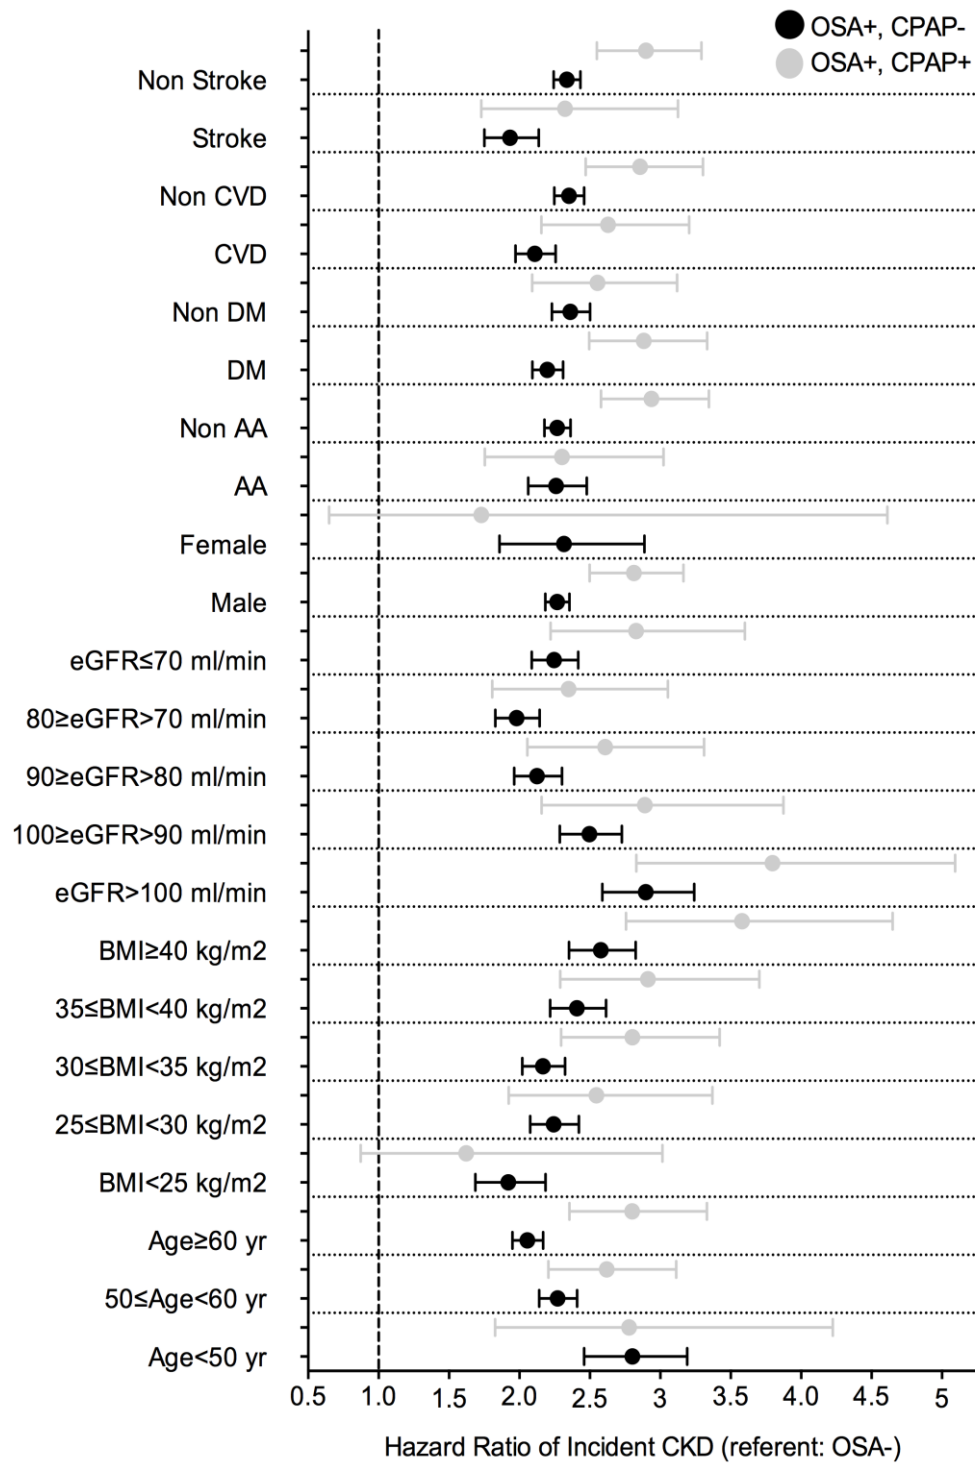

**Figure S6:**

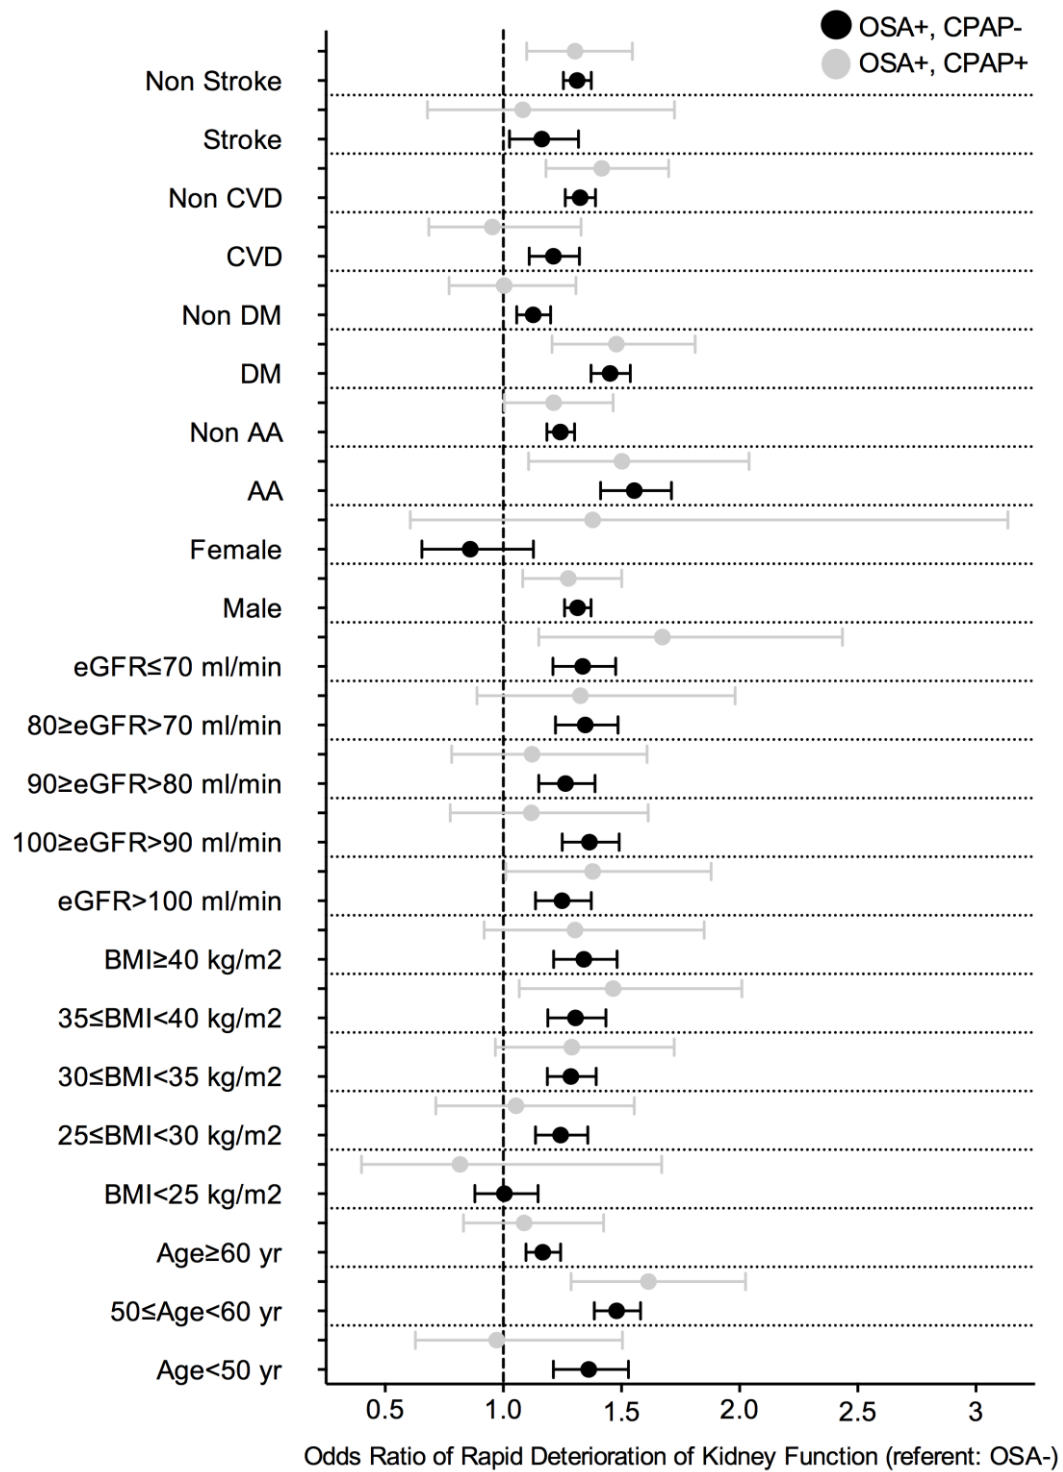

Supplement: thoraxjnl-2015-206970supp.pdf [file thoraxjnl-2015-206970supp.pdf]
